# Supplementary material for: Magnitude and frequency of heat and cold waves in recent decades: the case of South America
Source: Copernicus journal article supplement (doi:10.5194/nhess-16-821-2016), 2016-03-21
Supplement: Supplementary file 1 [file nhess-16-821-2016-supplement.pdf]

Supplement of Nat. Hazards Earth Syst. Sci., 16, 821–831, 2016  
<http://www.nat-hazards-earth-syst-sci.net/16/821/2016/>  
doi:10.5194/nhess-16-821-2016-supplement  
© Author(s) 2016. CC Attribution 3.0 License.

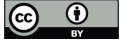

Natural Hazards  
and Earth System  
Sciences  Open Access

*Supplement of*

## **Magnitude and frequency of heat and cold waves in recent decades: the case of South America**

**Guido Ceccherini et al.**

*Correspondence to:* Cesar Carmona-Moreno ([cesar.carmona-moreno@jrc.ec.europa.eu](mailto:cesar.carmona-moreno@jrc.ec.europa.eu))

The copyright of individual parts of the supplement might differ from the CC-BY 3.0 licence.

## Supplement

Figure S1 shows the maximum value in 5-year periods of the  $HWMI_{tn}$  from 1980 to 2014.

Figure S2 shows the maximum value in 5-year periods of the  $CWMI_{tx}$  from 1980 to 2014.

Figure S3 and Fig. S4 complement the analysis showing the annual values from 1980 to 2014 of  $HWMI_{tx}$  and  $CWMI_{tn}$ , respectively.

**HWMI<sub>tn</sub> 1980-1984   HWMI<sub>tn</sub> 1985-1989   HWMI<sub>tn</sub> 1990-1994   HWMI<sub>tn</sub> 1995-1999**

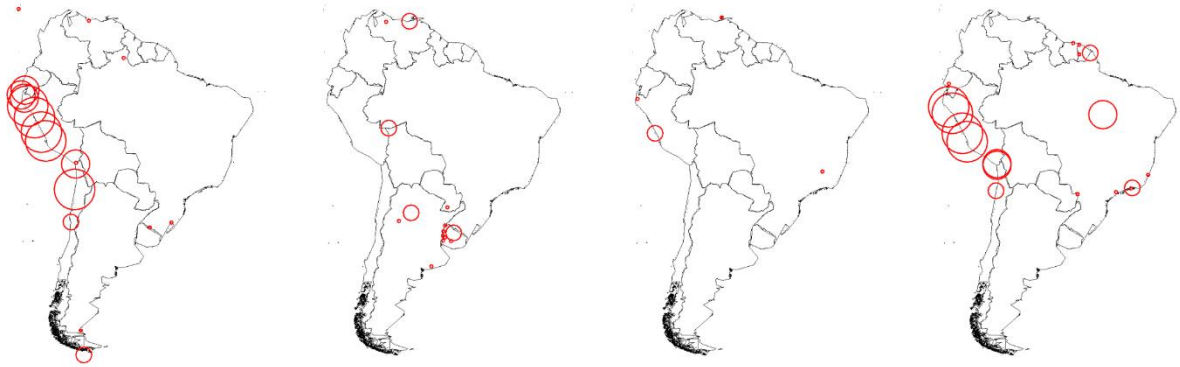

**HWMI<sub>tn</sub> 2000-2004   HWMI<sub>tn</sub> 2005-2009   HWMI<sub>tn</sub> 2010-2014**

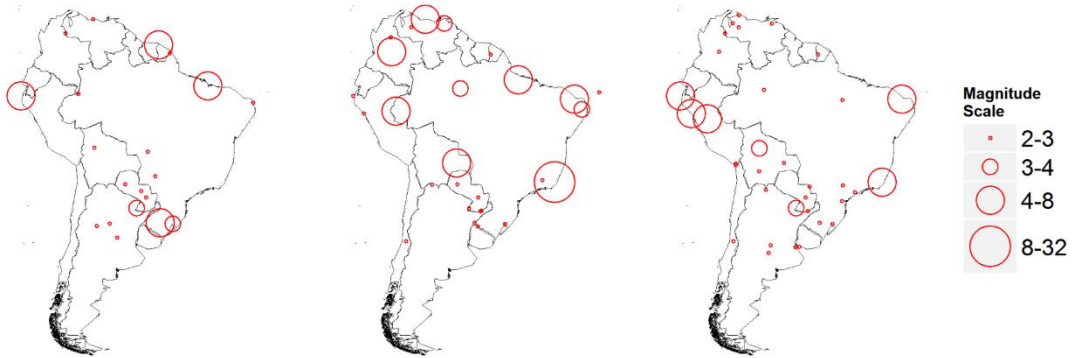

Figure S1 Magnitude of Heat Wave Index of minimum temperature (HWMI<sub>tn</sub>) for 5-year periods from 1980 to 2014.

**CWMI<sub>tx</sub> 1980-1984 CWMI<sub>tx</sub> 1985-1989 CWMI<sub>tx</sub> 1990-1994 CWMI<sub>tx</sub> 1995-1999**

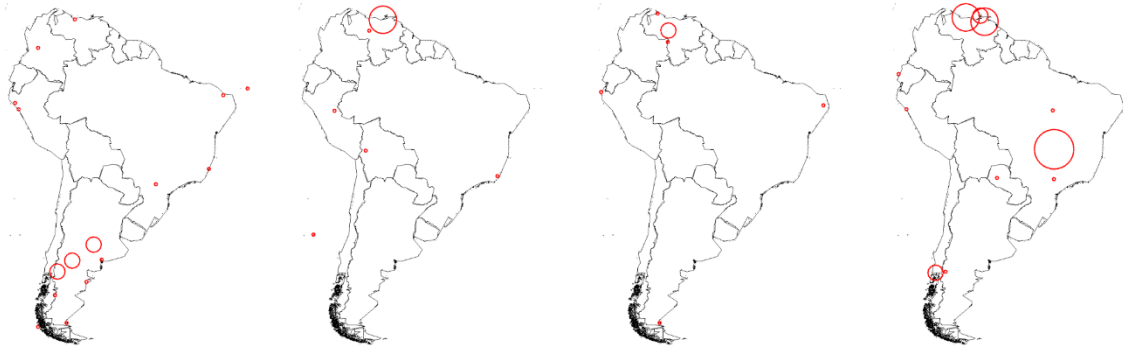

**CWMI<sub>tx</sub> 2000-2004 CWMI<sub>tx</sub> 2005-2009 CWMI<sub>tx</sub> 2010-2014**

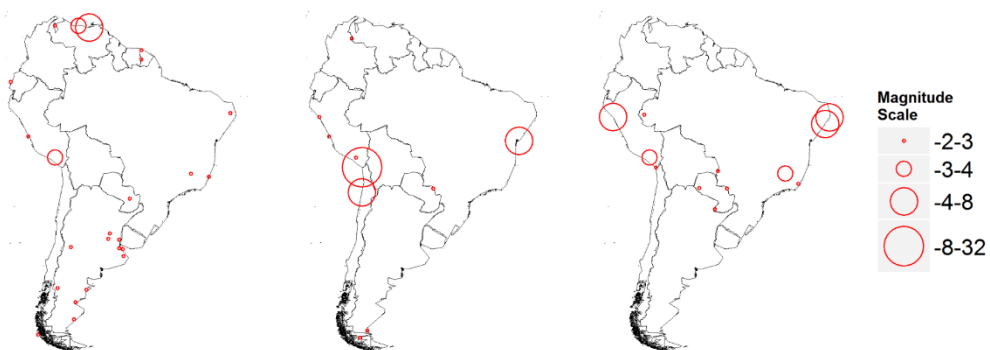

Figure S2 Magnitude of Cold Wave Index of maximum temperature (CWMI<sub>tx</sub>) for 5-year periods from 1980 to 2014

**HWMItx1980**

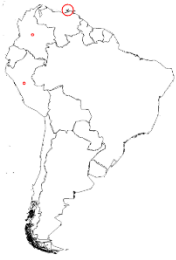

**HWMItx1981**

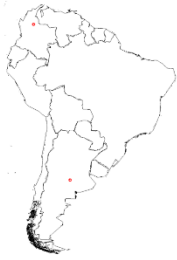

**HWMItx1982**

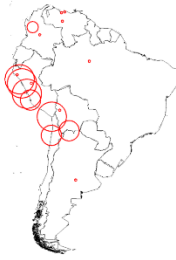

**HWMItx1983**

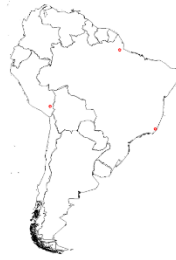

**HWMItx1984**

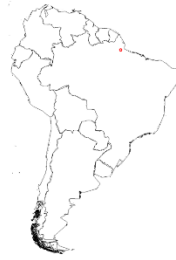

**HWMItx1985**

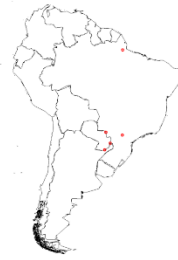

**HWMItx1986**

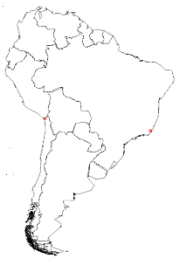

**HWMItx1987**

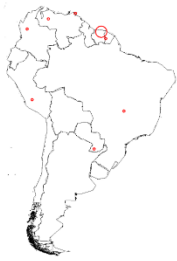

**HWMItx1988**

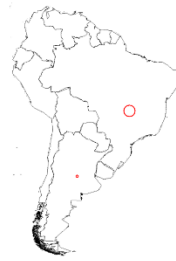

**HWMItx1989**

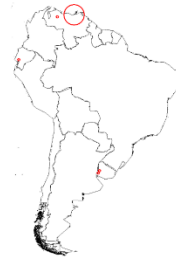

**HWMItx1990**

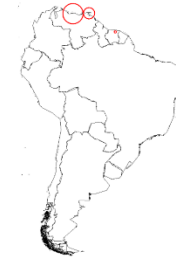

**HWMItx1991**

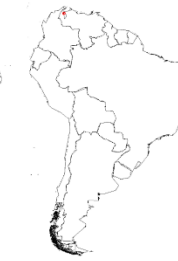

**HWMItx1992**

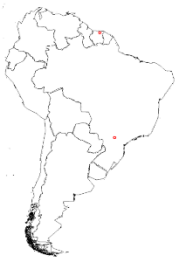

**HWMItx1993**

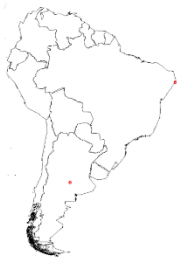

**HWMItx1994**

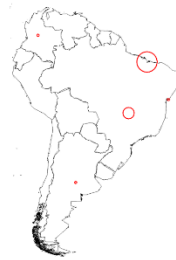

**HWMItx1995**

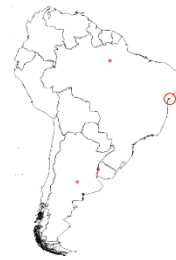

**HWMItx1996**

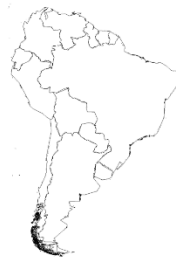

**HWMItx1997**

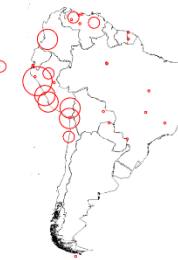

continue

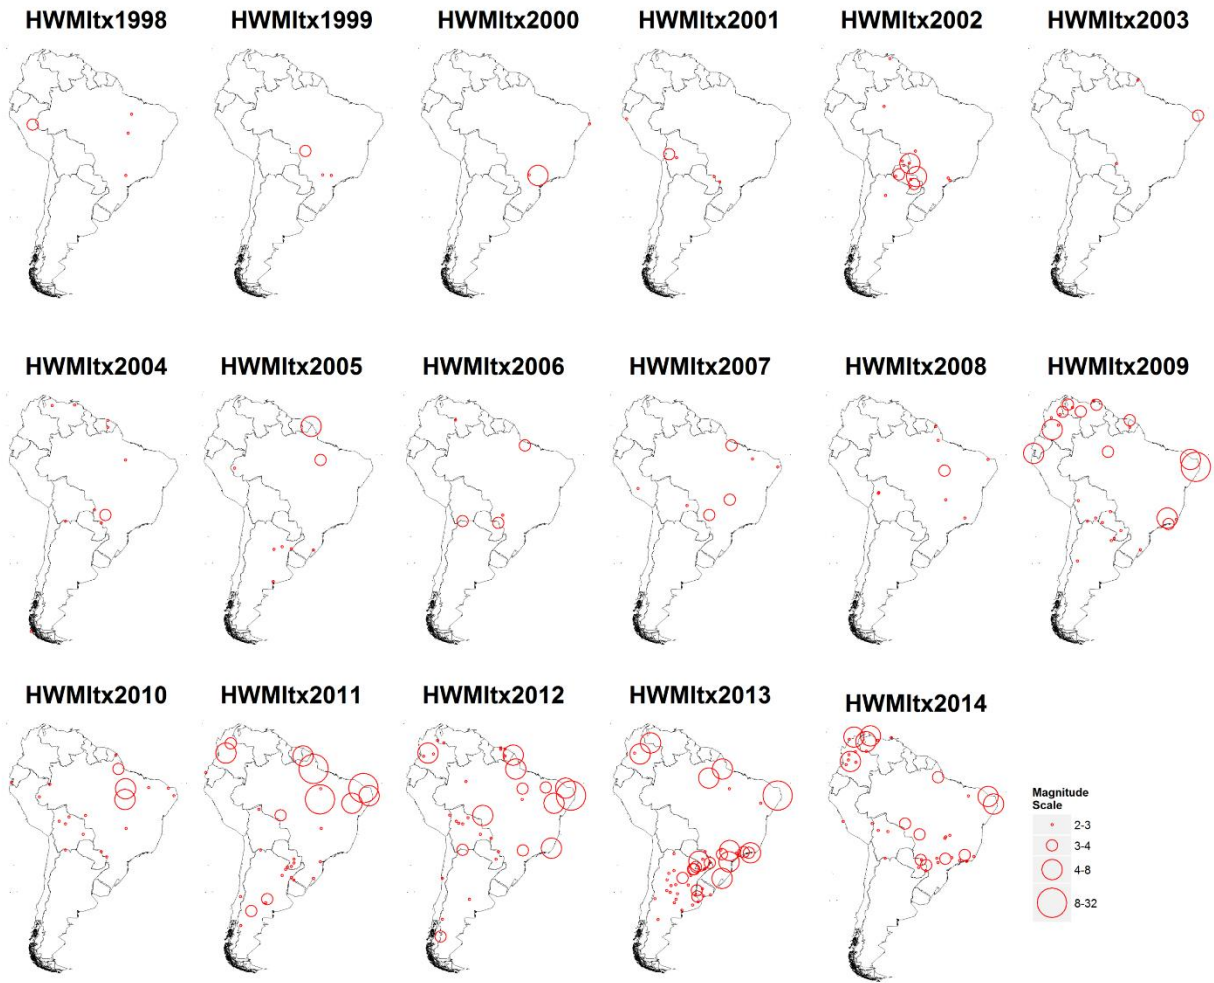

Figure S3 Annual values of Magnitude of Heat Wave Index of maximum temperature (HWMI<sub>tx</sub>) from 1980 to 2014.

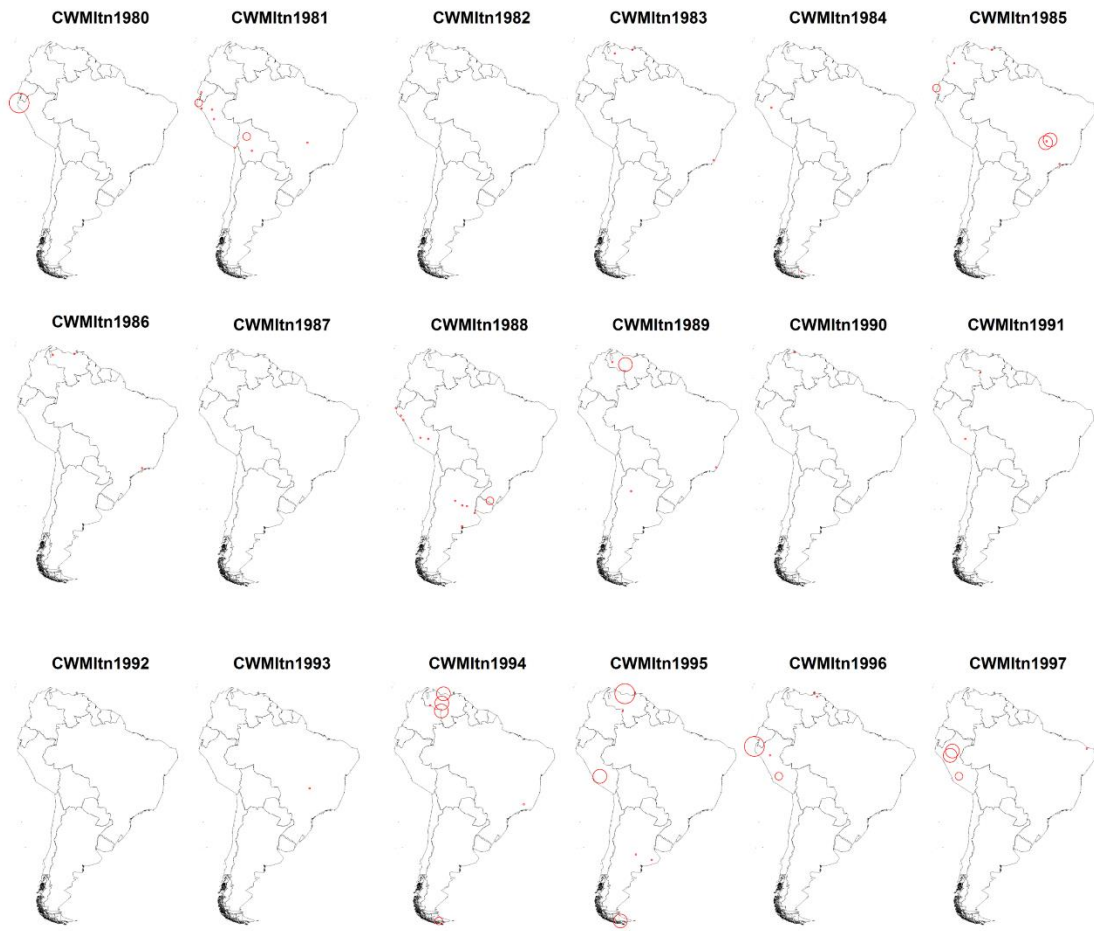

Continue

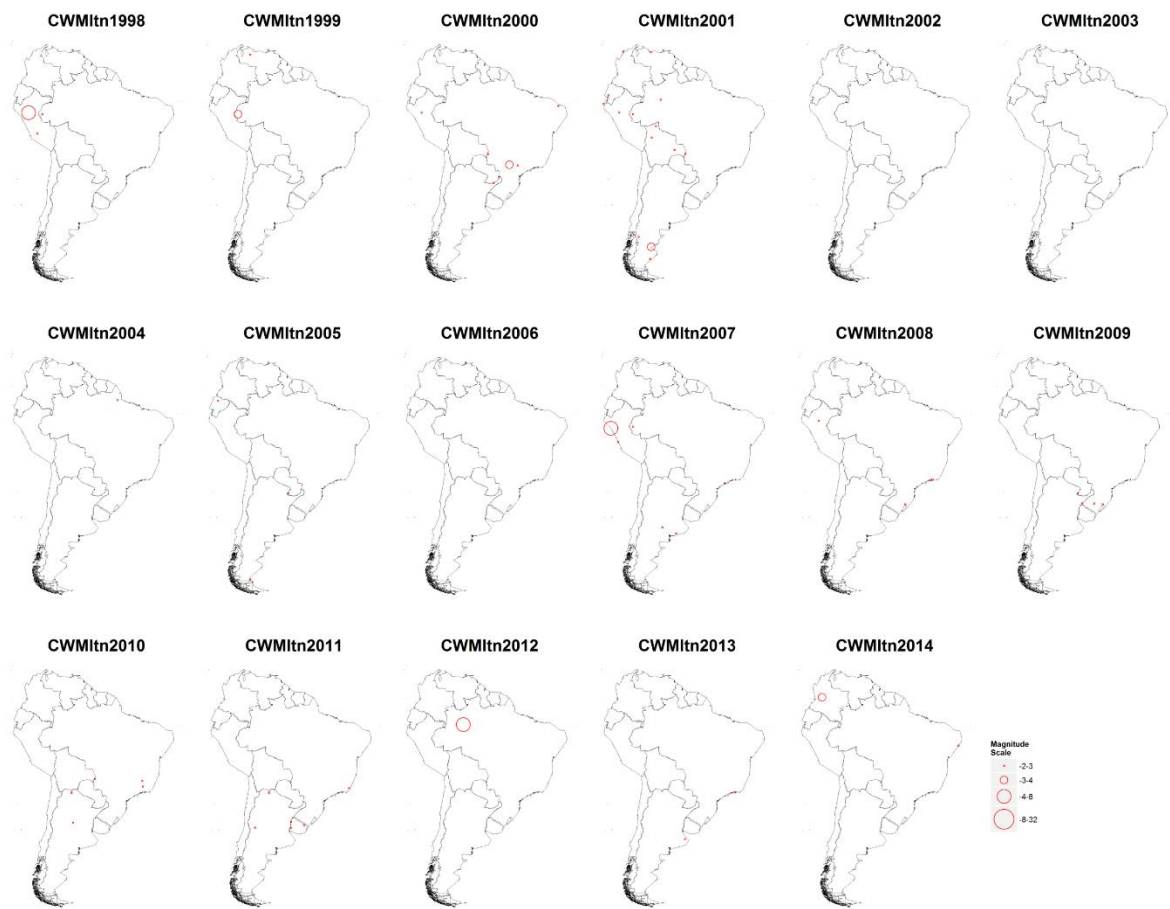

Figure S4 Annual values of Magnitude of Cold Wave Index of minimum temperature (CWMI<sub>tn</sub>) from 1980 to 2014.
